# Supplementary material
Source: publisher site journal article supplement (https://www.dovepress.com/article/303896)
Supplement: Supplementary file 1 [file get_supplementary_file.php]

**Appendix Table 1**: Definition of the relevant indicators requiring judgment by the clinicians

| Indicators | The detailed definition |
| --- | --- |
| Invasion/involvement of the vessels by naked eyes | The tumor close to the blood vessels under surgical exploration; Intra-operative placement of titanium clips; Intra-operative repair of the blood vessels close to the tumor. The major vessels were defined as the hepatic artery, portal vein and the trunk of the first branch of the hepatic vein. |
| Portal hypertension | 1: The imaging findings suggesting of the splenomegaly/fundamental esophageal varices (For example, the portal vein widened,CT cross-sectional examination revealed that the spleen was enlarged by more than 5 rib units);  2:Fundic esophageal varices found by the preoperative gastroscopy;  3:Negative exclusion of at least 2 preoperative imaging examinations, and one of which was the ultrasonography; |
| The definition of diaphragm invasion | The involvement of the diaphragm was judged according to the intra-operative exploration and surgical records; The repairing of the diaphragm was defined as a diaphragm invasion. |
| Preoperative tumor rupture | The existence of the previous hemorrhage in the abdominal cavity during the intra-operative exploration; The admission records /Current history. |
| The results of the preoperative hematological tests | The most recent preoperative hematological results; All results were within 1 month before the surgery. |
| Body height and body weight | Those recorded on the temperature sheet on the first day of admission; In case of lack of the temperature sheet, then referring to the anesthesia sheet. |
| The postoperative adjuvant therapy | In principle, the postoperative adjuvant therapy was provided within 3 months after the surgery, up to a maximum of 6 months, if the adjuvant therapy was performed more than 6 months postoperatively, it should be considered to be the case of recurrence. |
| Preoperative therapy | The treatments were conducted before the finding of the tumor. |
